# Supplementary material for: Advances in altimetric snow depth estimates using bi-frequency SARAL/CryoSat-2 Ka/Ku measurements
Source: Copernicus journal article supplement (doi:10.5194/tc-2021-79), 2021-04-13
Supplement: Supplementary file 1 [file tc-2021-79-supplement.pdf]

# Advances in altimetric snow depth estimates using bi-frequency SARAL/CryoSat-2 Ka/Ku measurements.

Florent.Garnier <sup>1</sup>, Sara.Fleury <sup>1</sup>, Gilles.Garric <sup>5</sup>, Jérôme.Bouffard <sup>4</sup>, Michel.Tsamados <sup>2</sup>, Antoine.Laforge <sup>3</sup>, Marion.Bocquet <sup>1</sup>, Frédérique.Remy <sup>1</sup>, and Renée Mie.Fredensborg Hansen <sup>6</sup>

<sup>1</sup> Laboratoire d'Etudes en Géophysique et Océanographie Spatiales (LEGOS), CNRS/UMR5566, Université Paul Sabbatier, 31400 Toulouse, FRANCE

<sup>2</sup> Centre for Polar Observation and Modelling, Department of Earth Sciences, University College London, London, WC1E 6BT, UK

<sup>3</sup> Serco c/o ESA, Earth Observation Directorate, Via Galileo Galilei, 2-00044 Frascati, Italy

<sup>4</sup> ESA (European Space Agency), Earth Observation Directorate, Via Galileo Galilei, 2-00044 Frascati, Italy

<sup>5</sup> Mercator Ocean, Ramonville Saint Agne, 31520, FRANCE

<sup>6</sup> ESA (European Space Agency), ESRIN, Via Galileo Galilei, 2-00044 Frascati, Italy

**Correspondence:** F.garnier (florent.garnier@legos.obs-mip.fr)

## Supplementaries

## 1 Arctic 2015 monthly snow depth maps

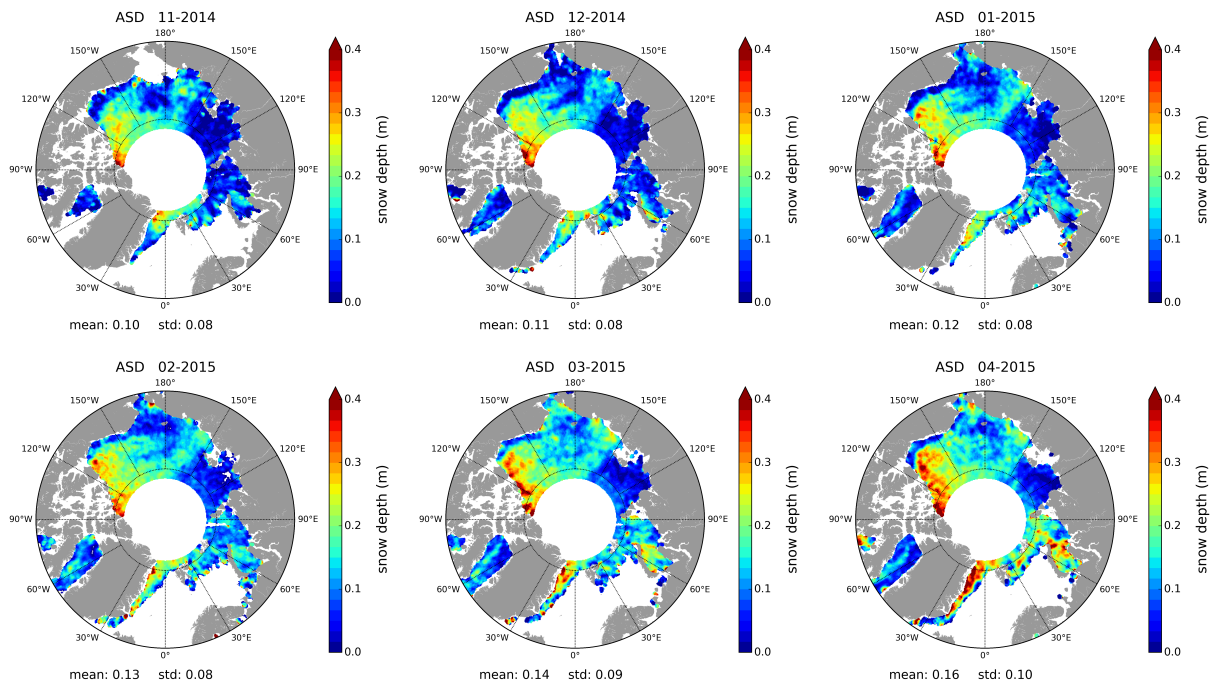

**Figure S1.** ASD monthly mean snow depth maps for the six Arctic winters 2014-2015.

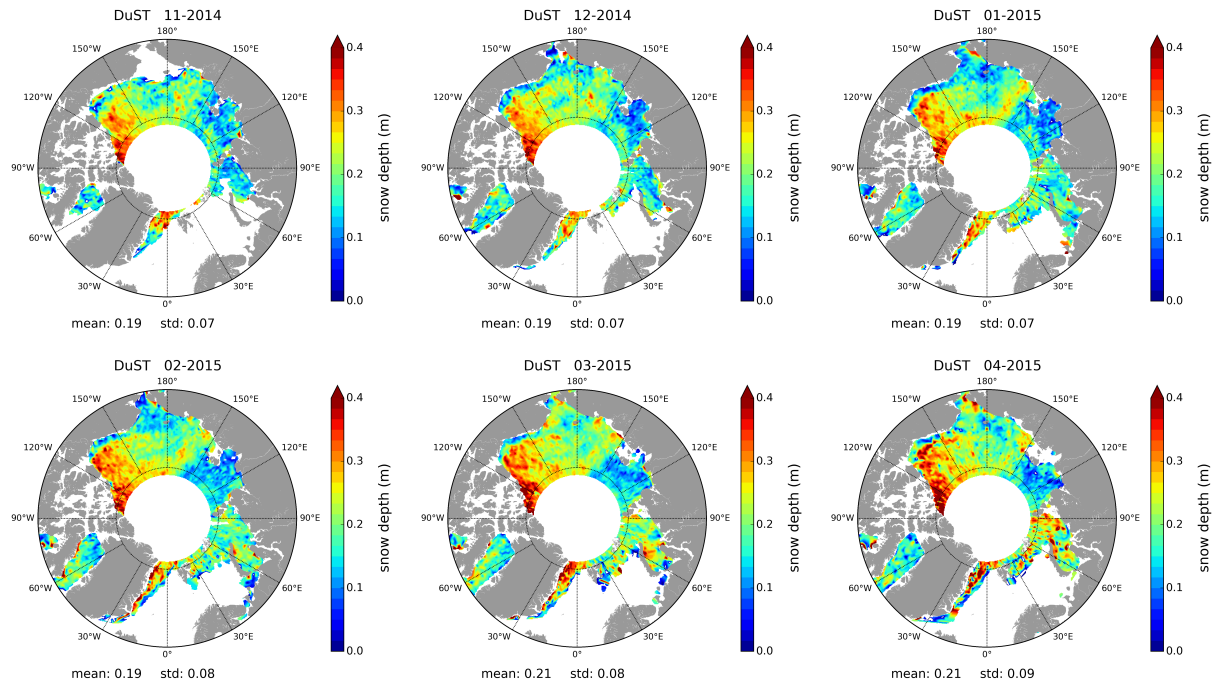

**Figure S2.** DuST monthly mean snow depth maps for the six Arctic winters 2014-2015.

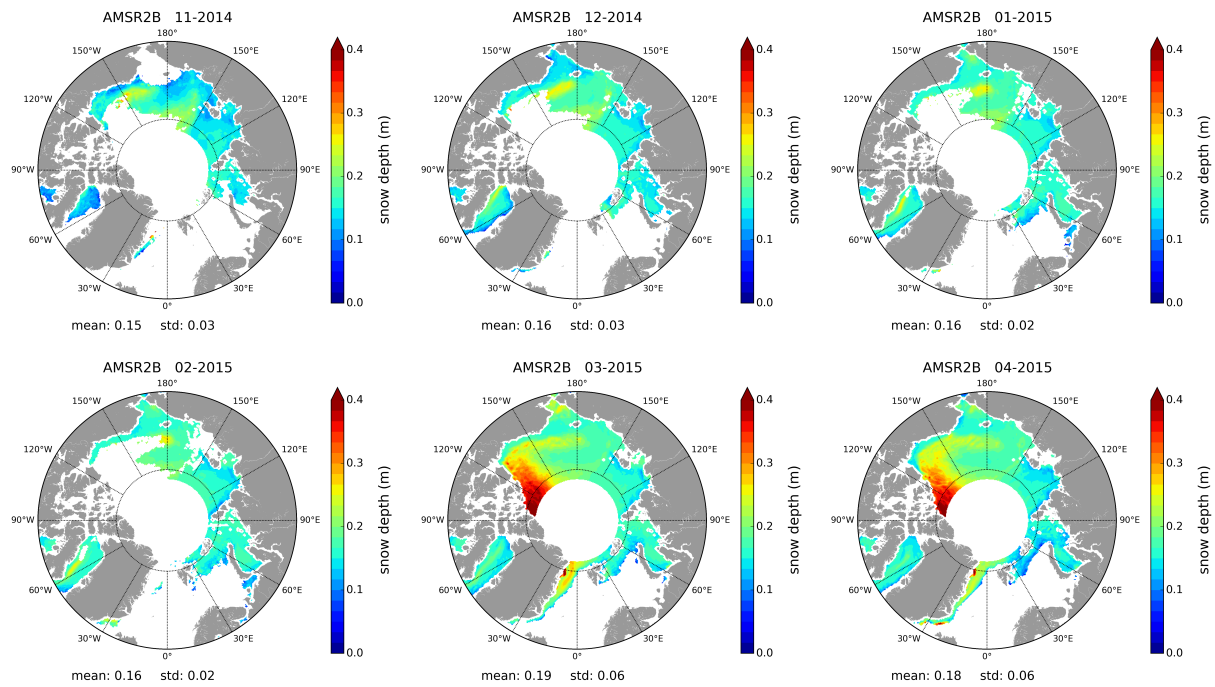

**Figure S3.** AMSR2B monthly mean snow depth maps for the six Arctic winters 2014-2015.

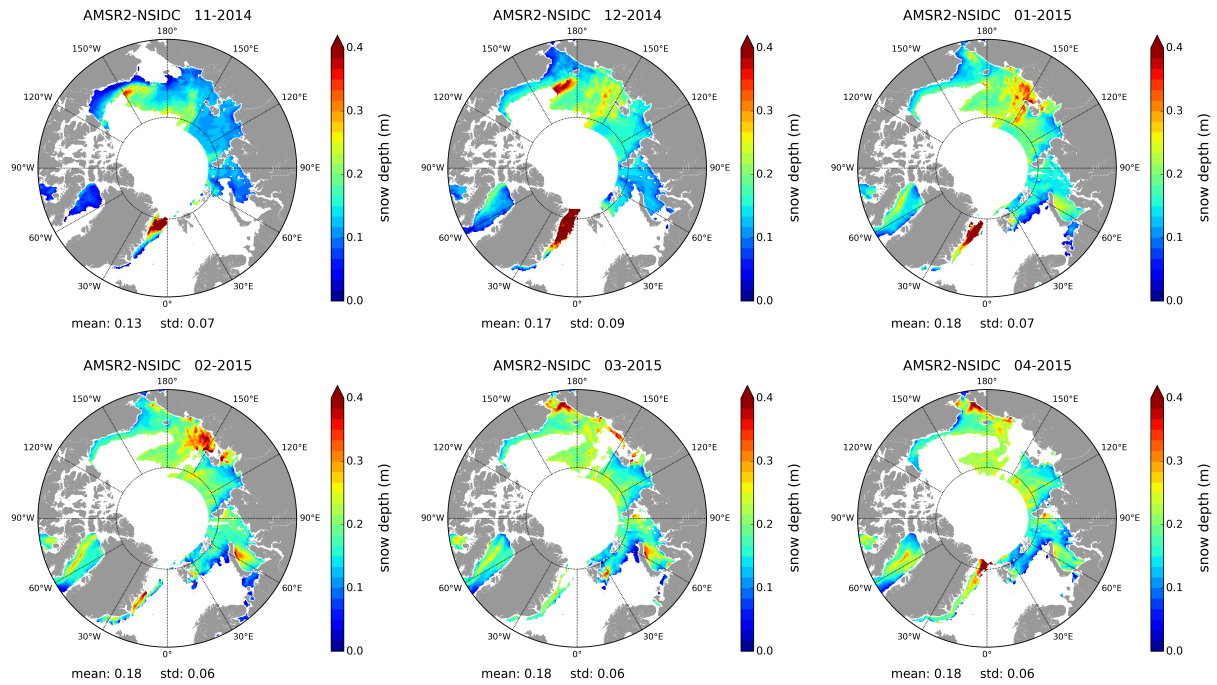

**Figure S4.** AMSR2-NSIDC monthly mean snow depth maps for the six Arctic winters 2014-2015.

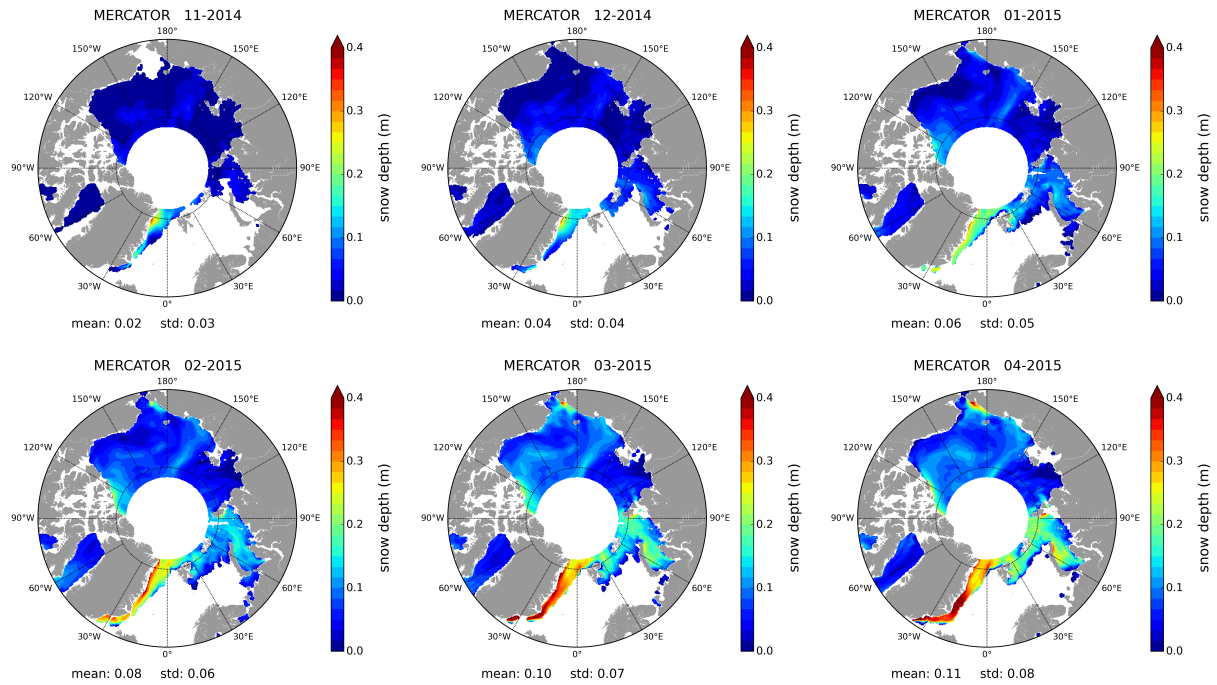

**Figure S5.** MERCATOR monthly mean snow depth maps for the six Arctic winters 2014-2015.

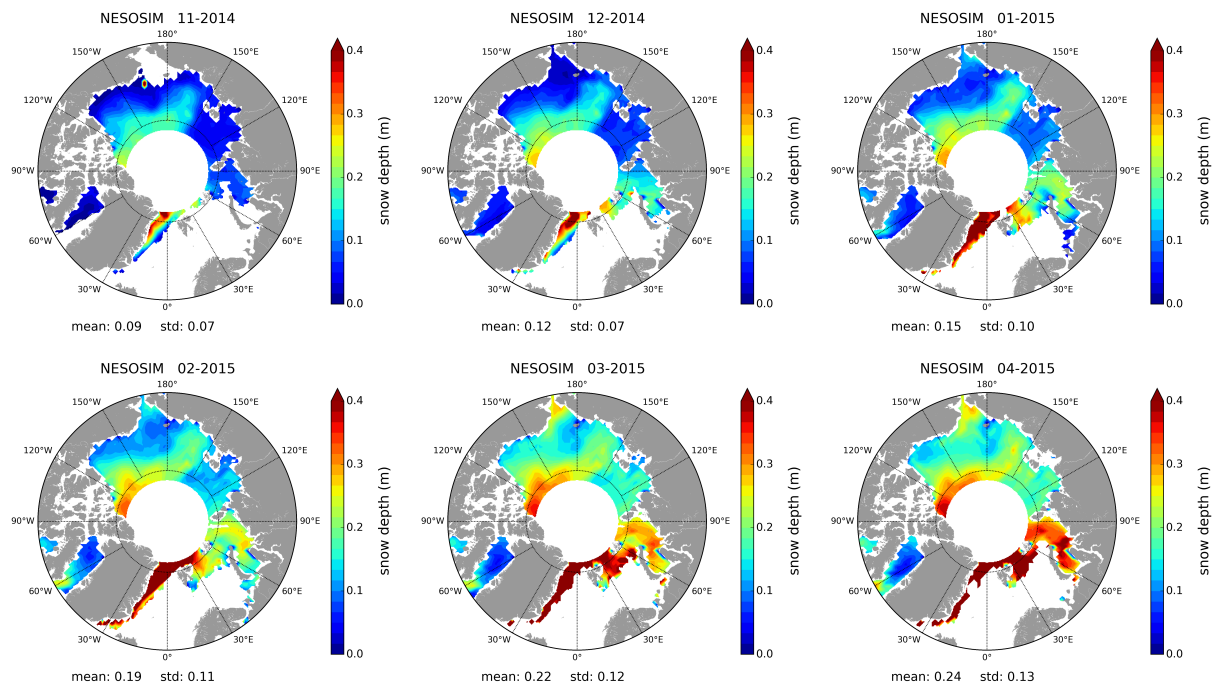

**Figure S6.** NESOSIM monthly mean snow depth maps for the six Arctic winters 2014-2015.

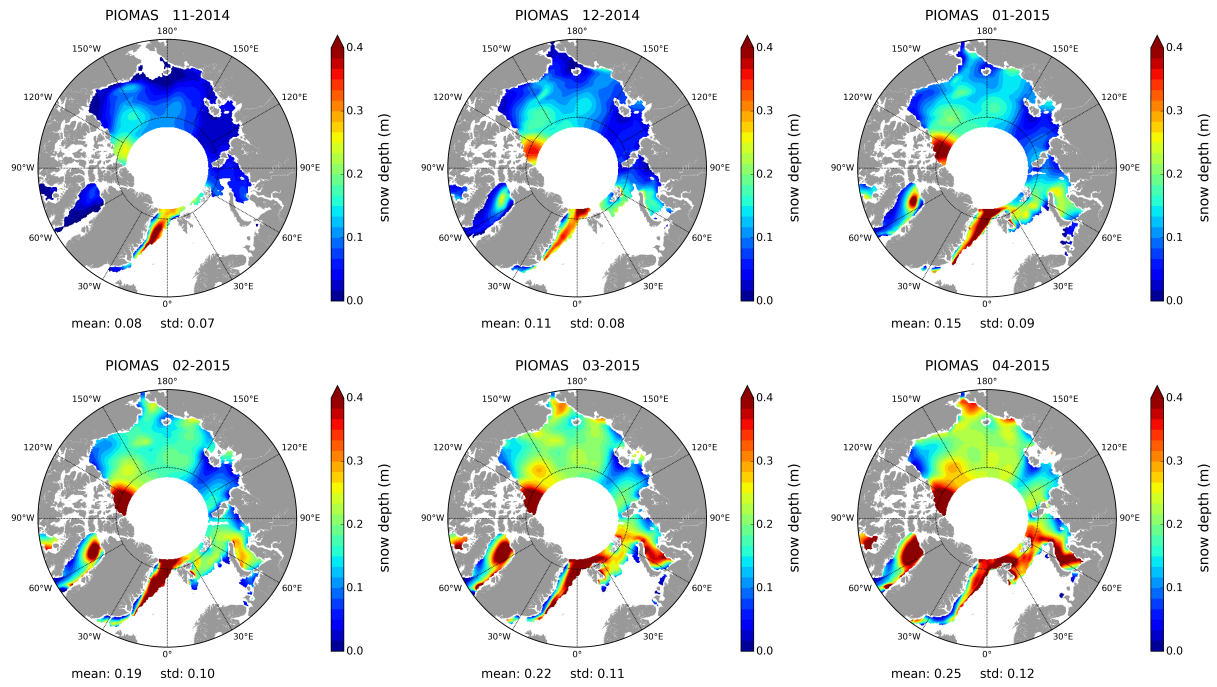

**Figure S7.** PIOMAS monthly mean snow depth maps for the six Arctic winters 2014-2015.



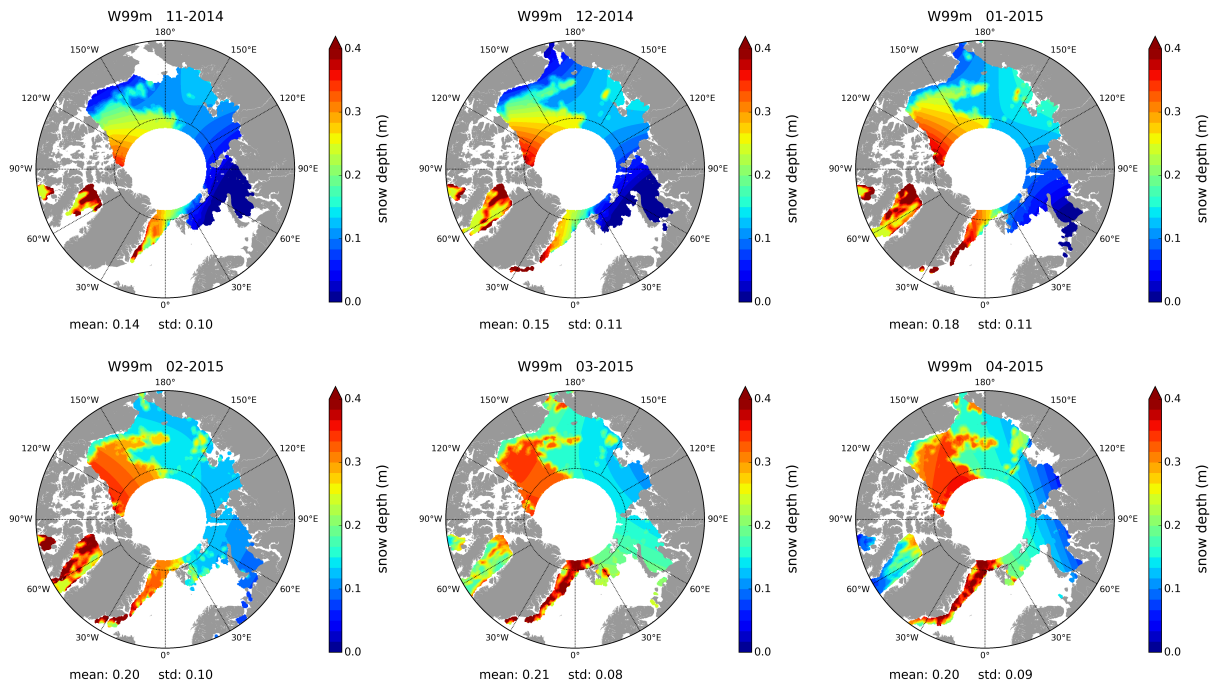

**Figure S8.** W99m monthly mean snow depth maps for the six Arctic winters 2014-2015.

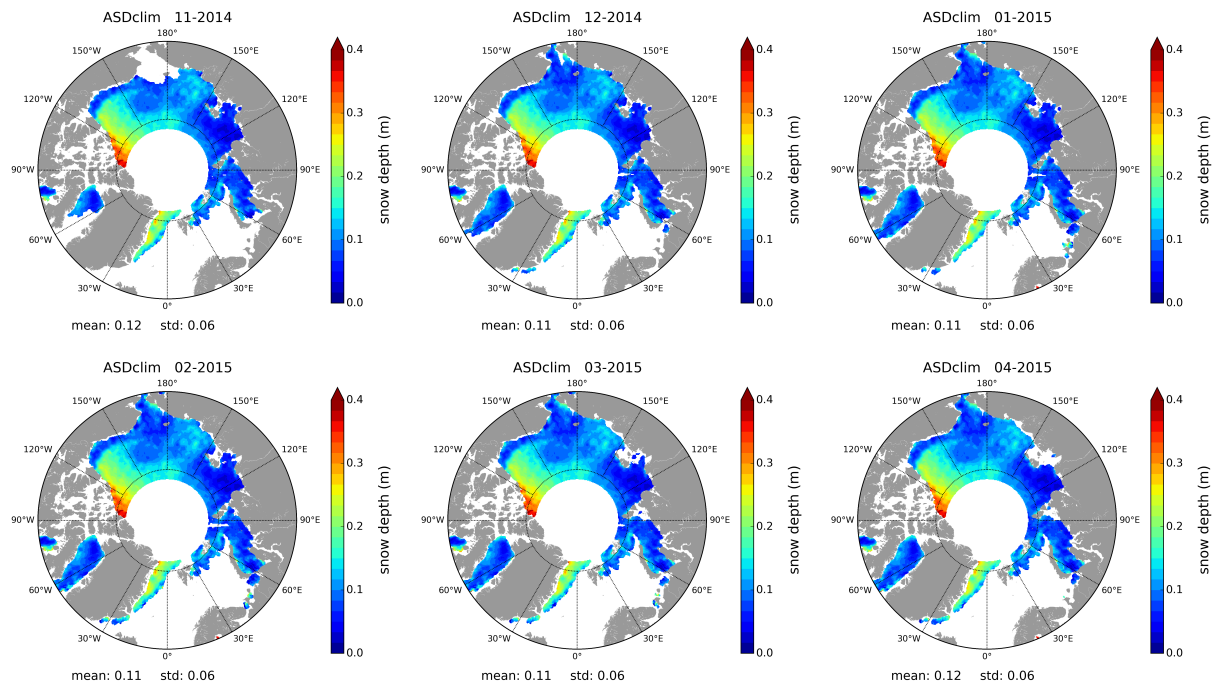

**Figure S9.** ASDclim monthly mean snow depth maps for the six Arctic winters 2014-2015.

## 2 Antarctic 2015 monthly snow depth maps

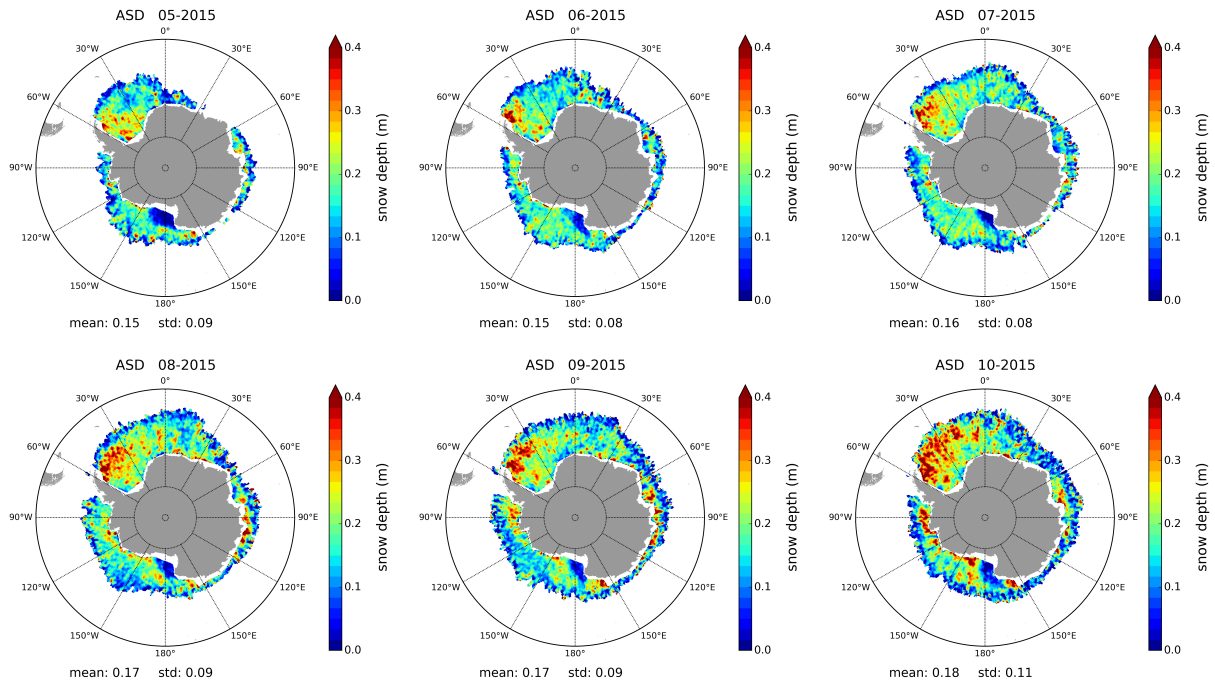

**Figure S10.** ASD monthly mean snow depth maps for the six Antarctic winters 2014-2015.

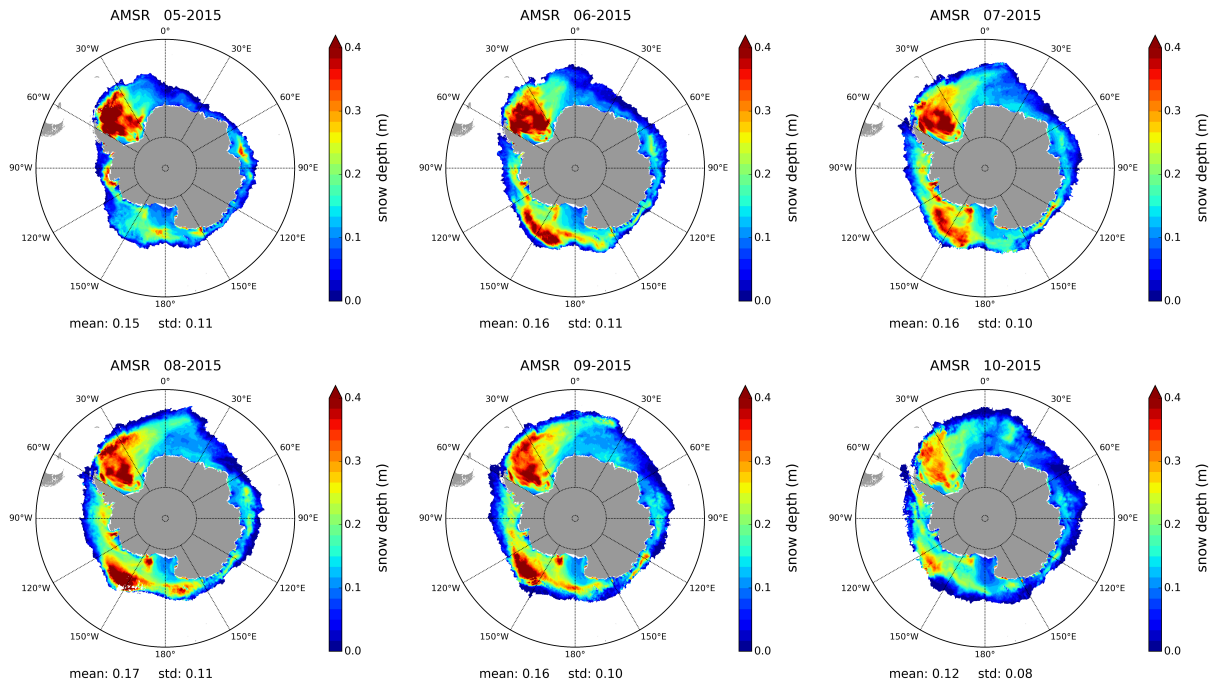

**Figure S11.** AMSR2-NSIDC monthly mean snow depth maps for the six Antarctic winters 2014-2015.

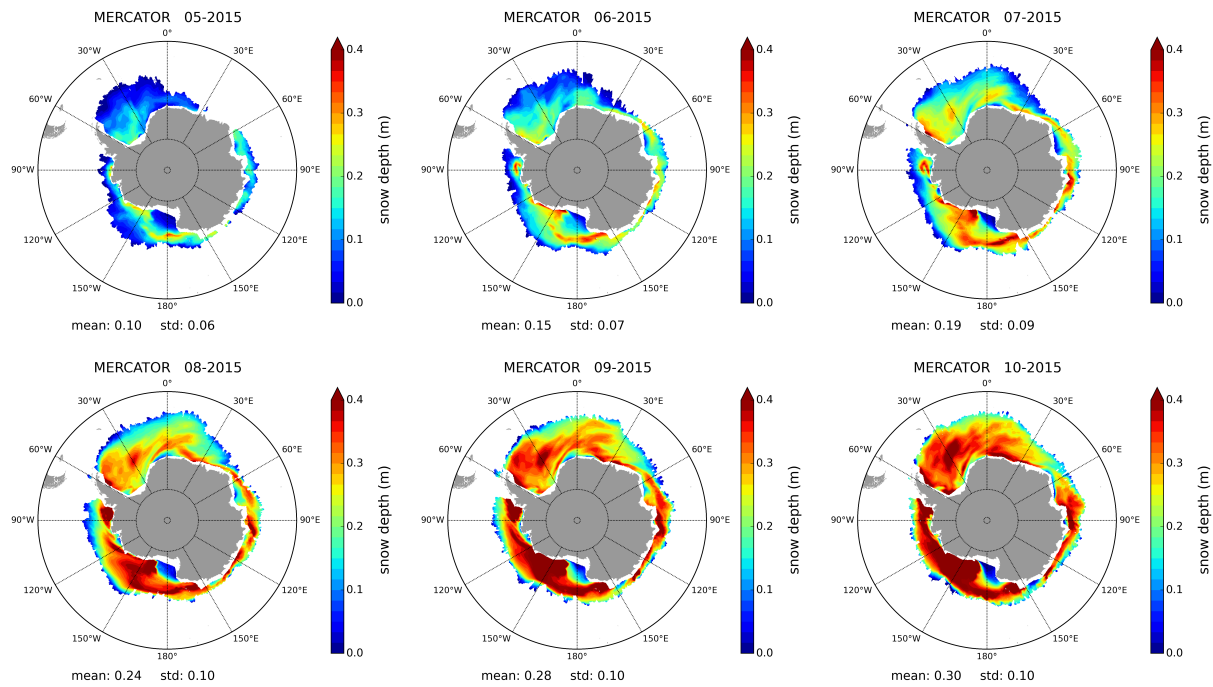

**Figure S12.** MERCATOR monthly mean snow depth maps for the six Antarctic winters 2014-2015.

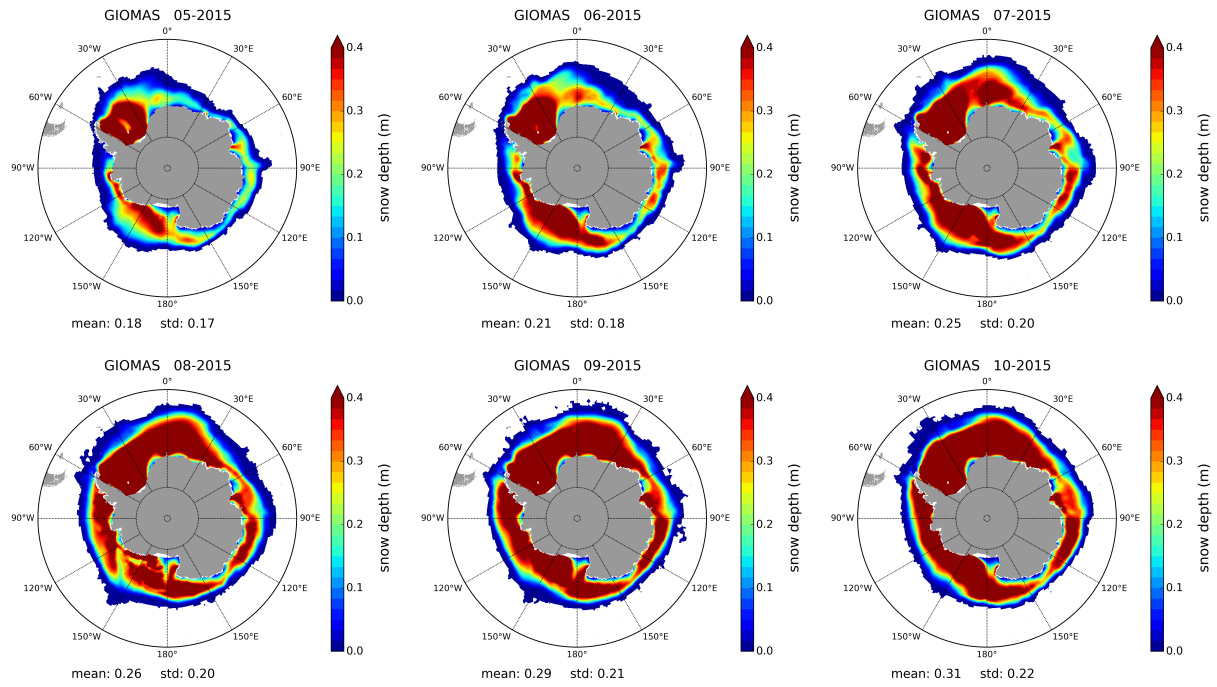

**Figure S13.** GIOMAS monthly mean snow depth maps for the six Antarctic winters 2014-2015.

### 3 Along track comparison with OIB

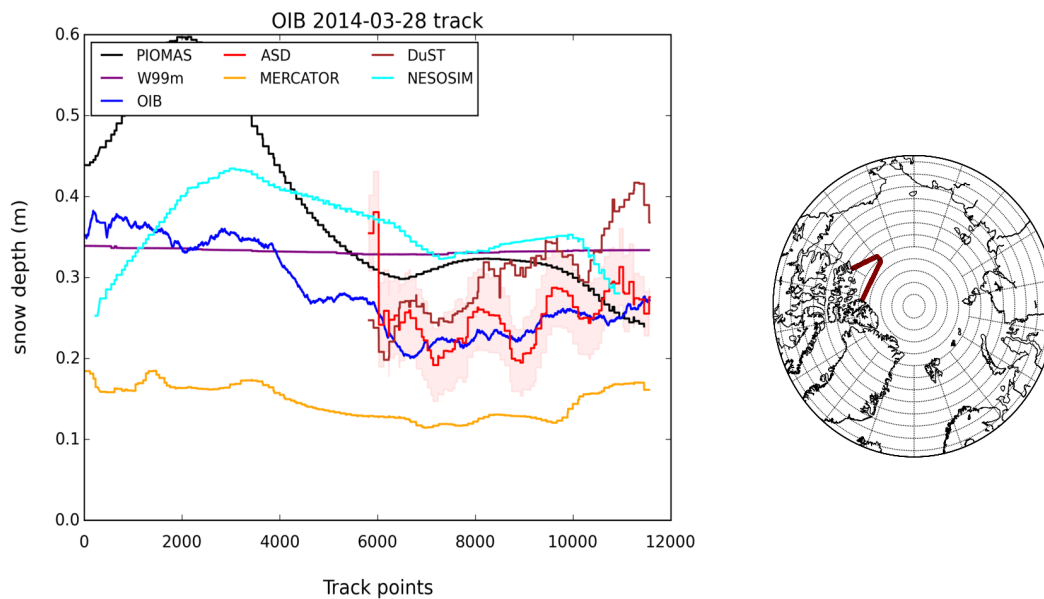

**Figure S14.** Along track comparison between the snow depth products and the OIB snow radar data during the 28<sup>th</sup> March 2014 campaign in the Arctic. The red envelope refers to the ASD uncertainties. The Map specify the geographical location of this OIB track.

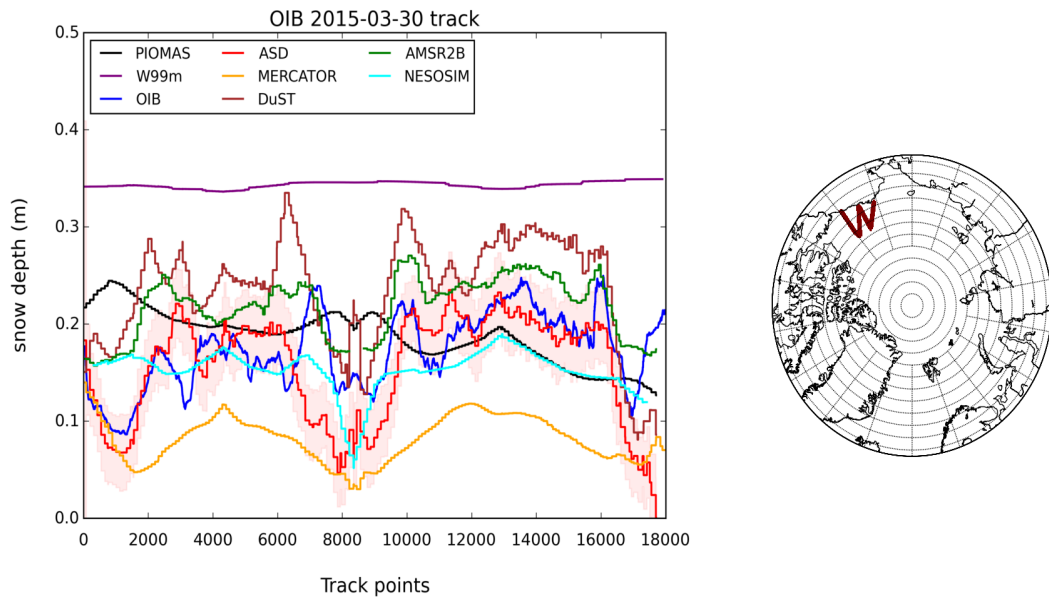

**Figure S15.** Along track comparison between the snow depth products and the OIB snow radar data during the 30<sup>th</sup> March 2015 campaign in the Arctic. The red envelope refers to the ASD uncertainties. The Map specify the geographical location of this OIB track.



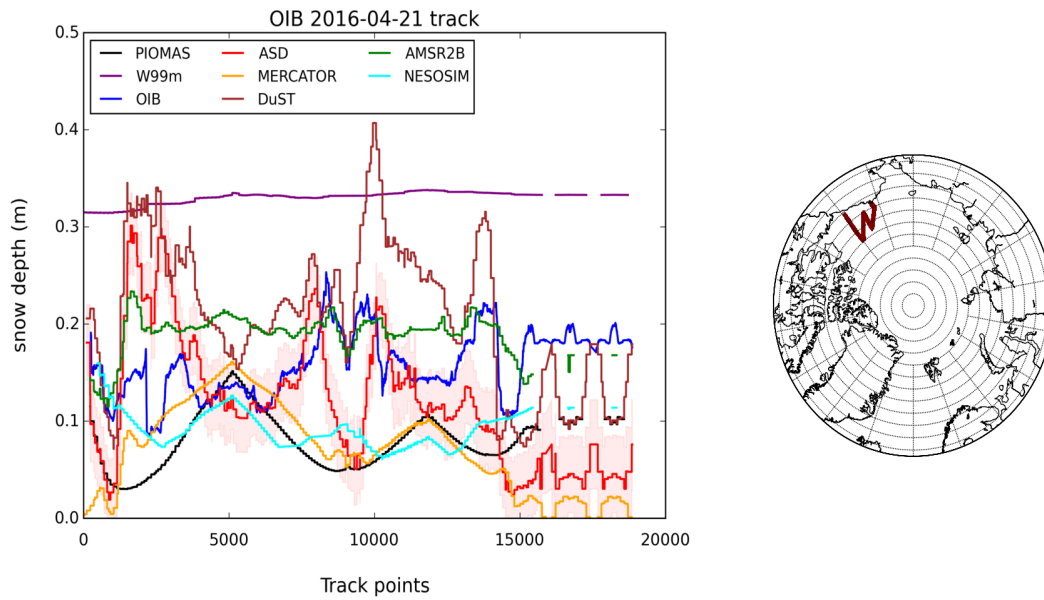

**Figure S16.** Along track comparison between the snow depth products and the OIB snow radar data during the 21<sup>st</sup> April 2016 campaign in the Arctic. The red envelope refers to the ASD uncertainties. The Map specify the geographical location of this OIB track.

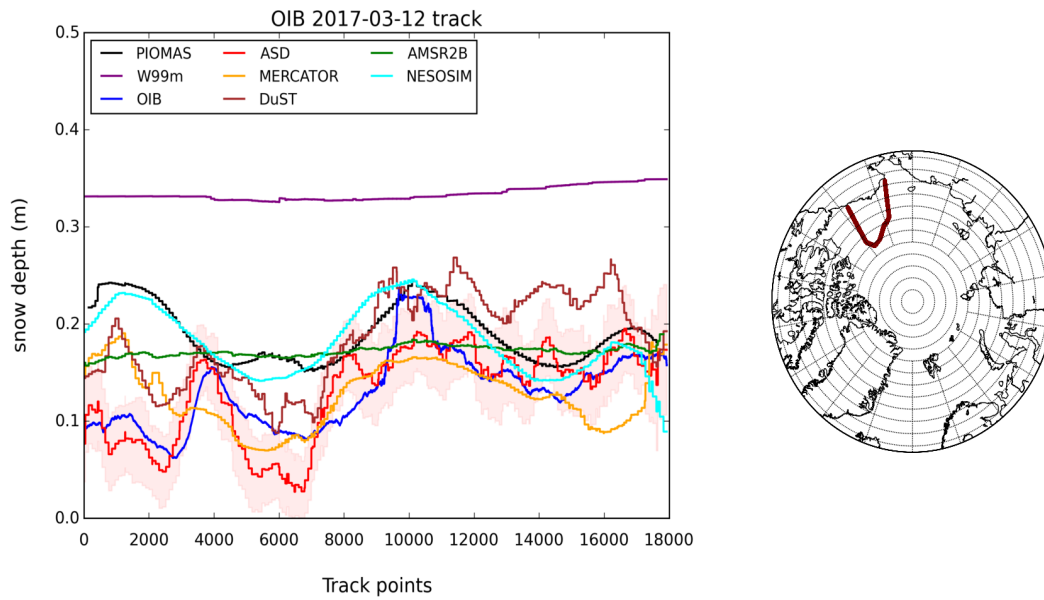

**Figure S17.** Along track comparison between the snow depth products and the OIB snow radar data during the 3<sup>rd</sup> March 2017 campaign in the Arctic. The red envelope refers to the ASD uncertainties. The Map specify the geographical location of this OIB track.

## 5 4 Arctic 2015 SIT maps

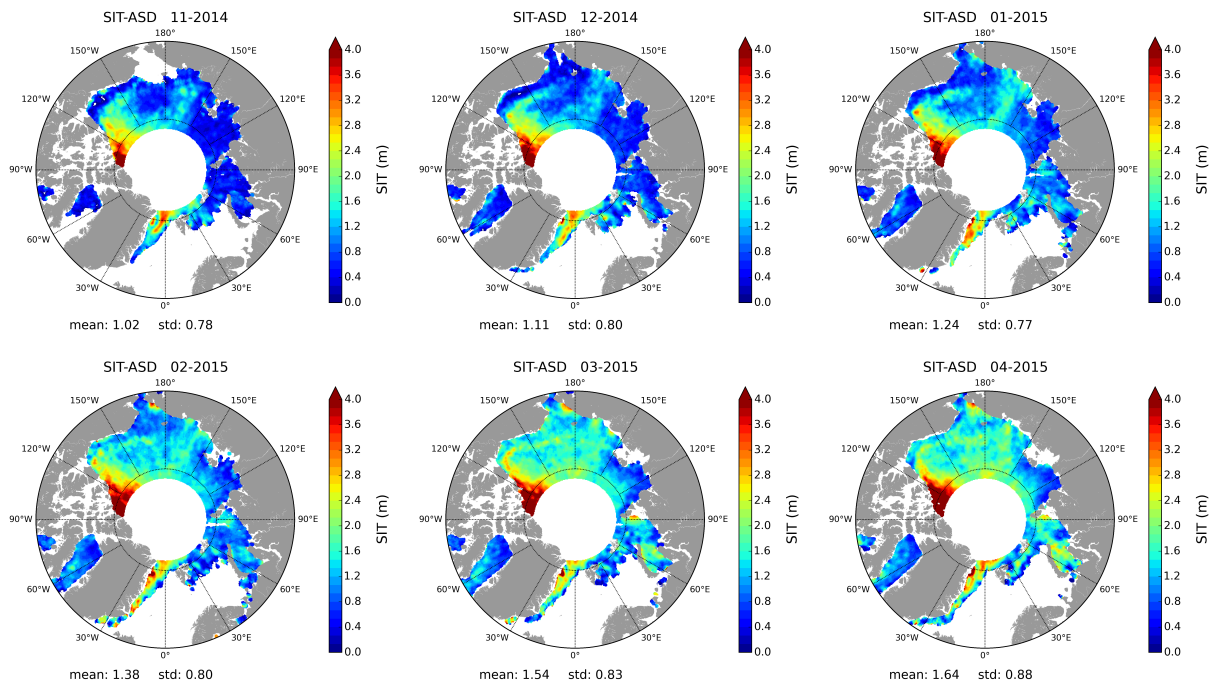

**Figure S18.** SIT monthly mean maps calculated with the ASD snow depth data for the six Arctic winters 2014-2015.

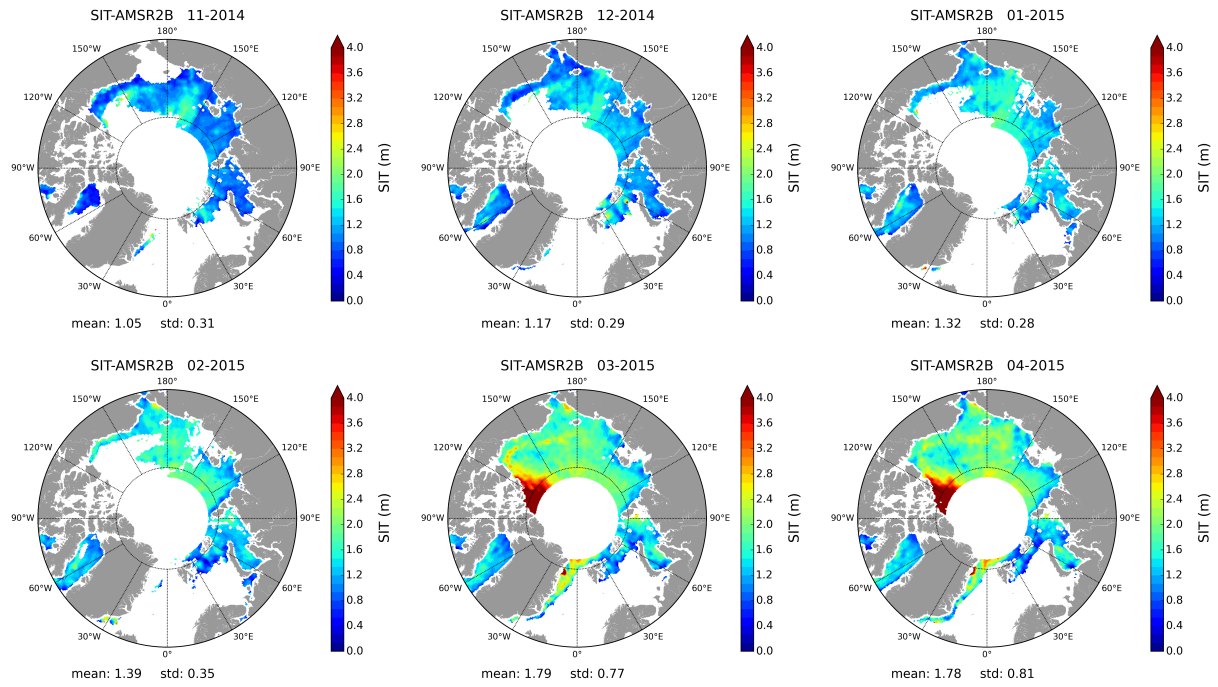

**Figure S19.** SIT monthly mean maps calculated with the AMSR2B snow depth data for the six Arctic winters 2014-2015.

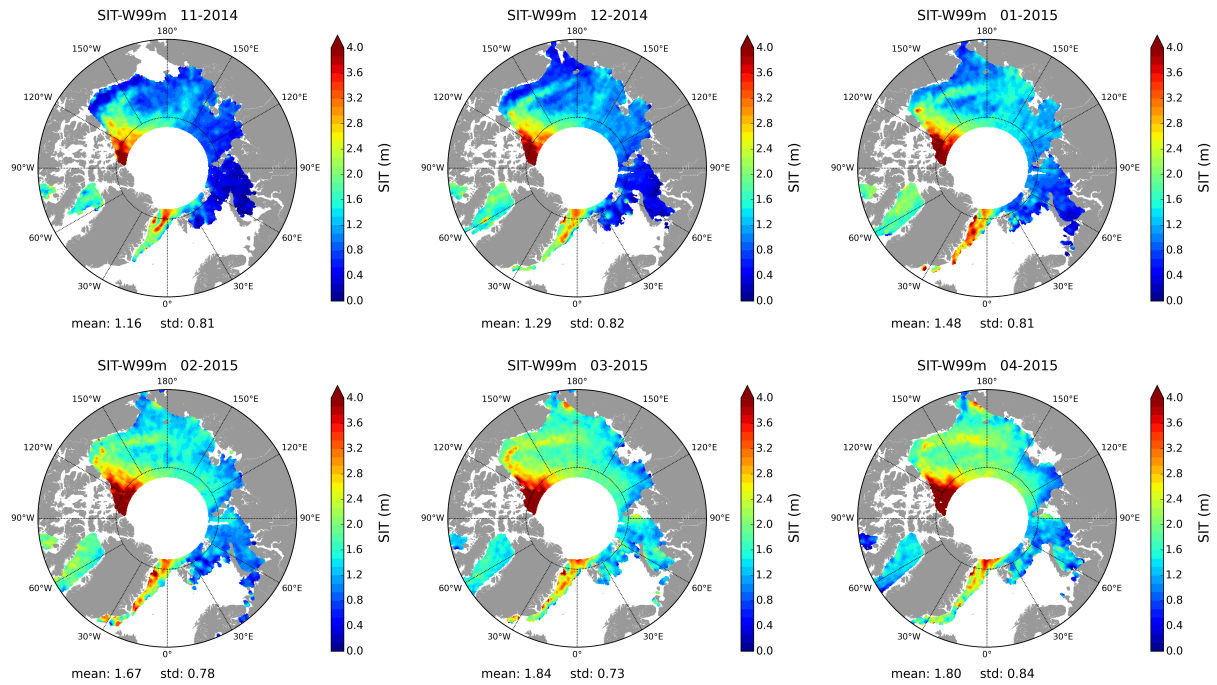

**Figure S20.** SIT monthly mean maps calculated with the W99m snow depth data for the six Arctic winters 2014-2015.

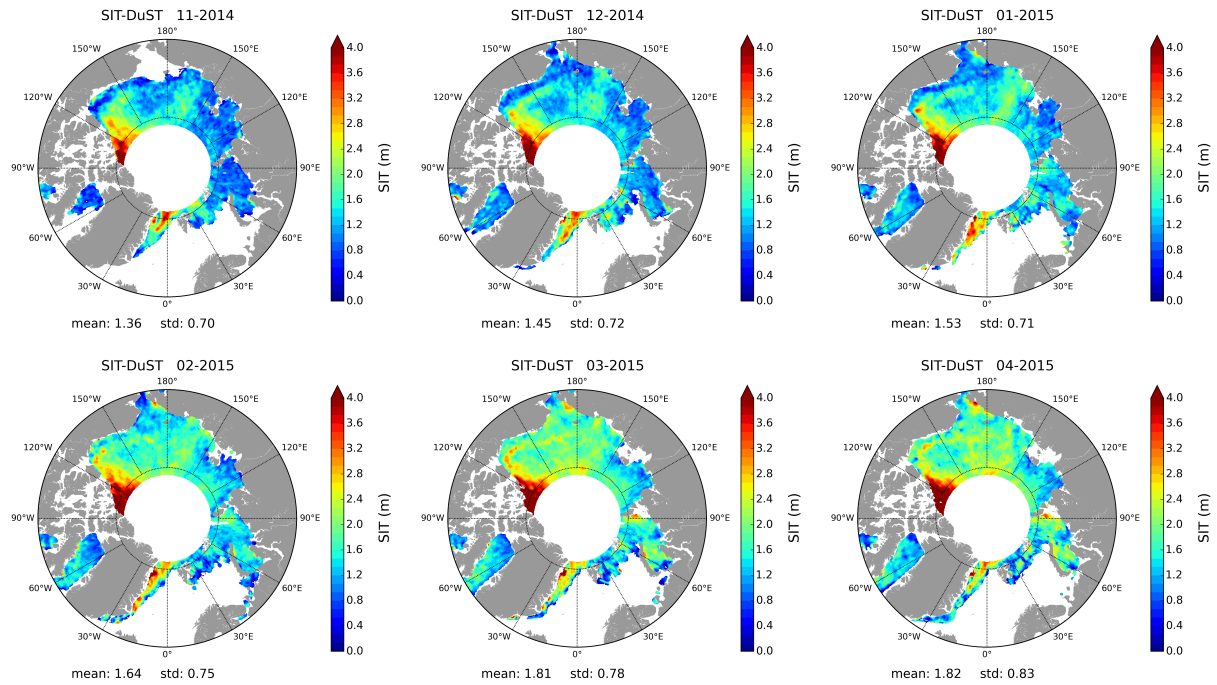

**Figure S21.** SIT monthly mean maps calculated with the DuST snow depth data for the six Arctic winters 2014-2015.

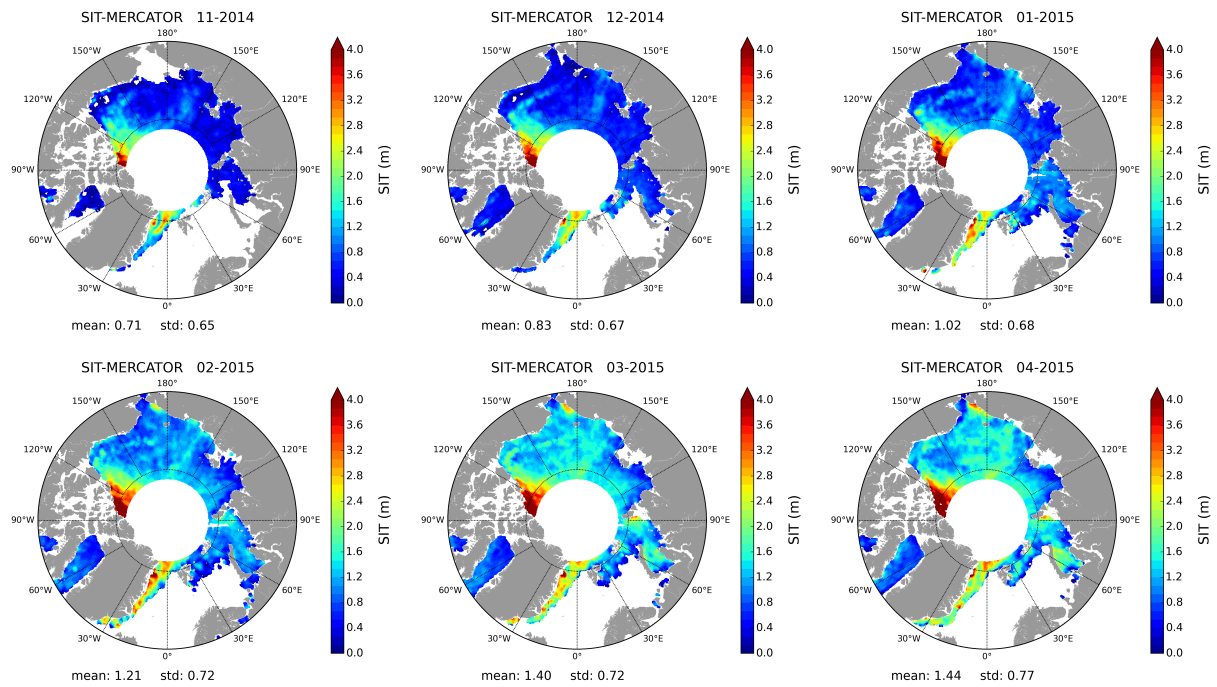

**Figure S22.** SIT monthly mean maps calculated with the MERCATOR snow depth data for the six Arctic winters 2014-2015.

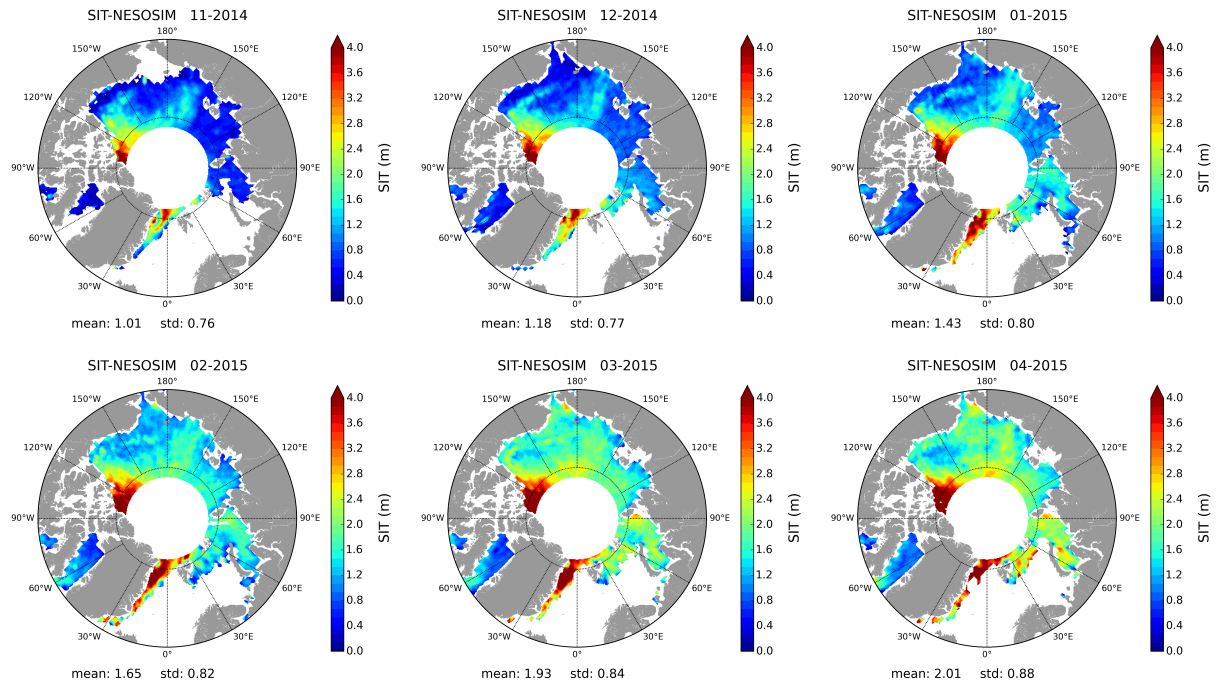

**Figure S23.** SIT monthly mean maps calculated with the NESOSIM snow depth data for the six Arctic winters 2014-2015.



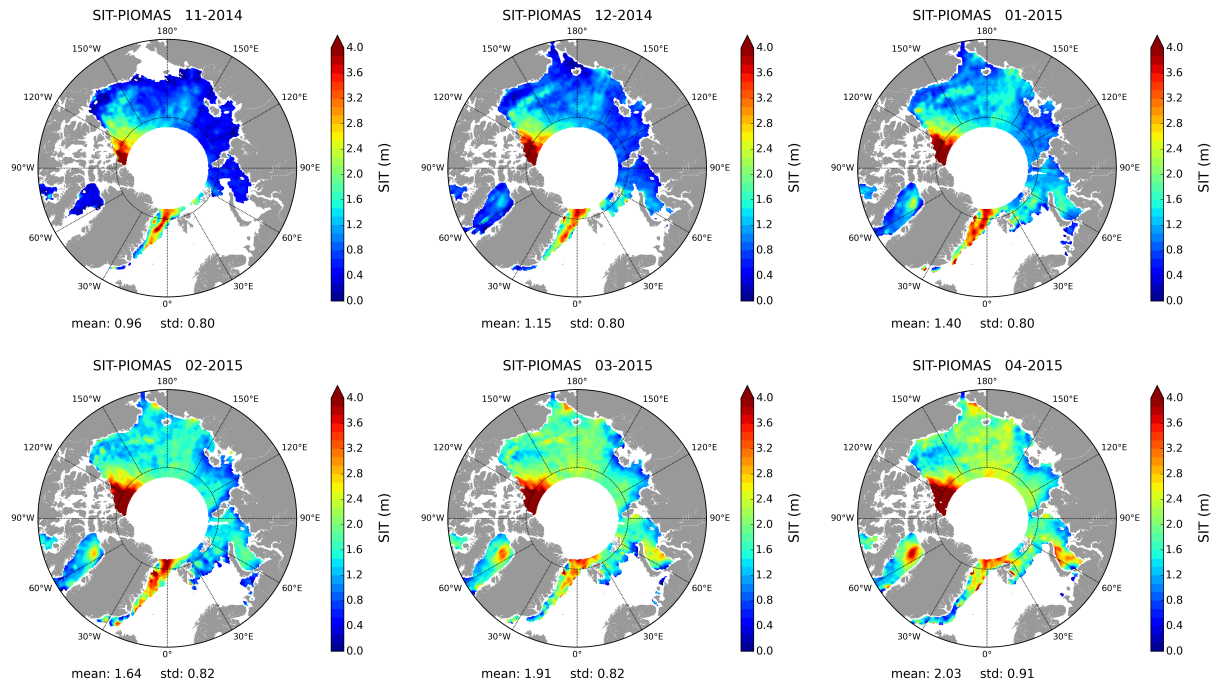

**Figure S24.** SIT monthly mean maps calculated with the PIOMAS snow depth data for the six Arctic winters 2014-2015.

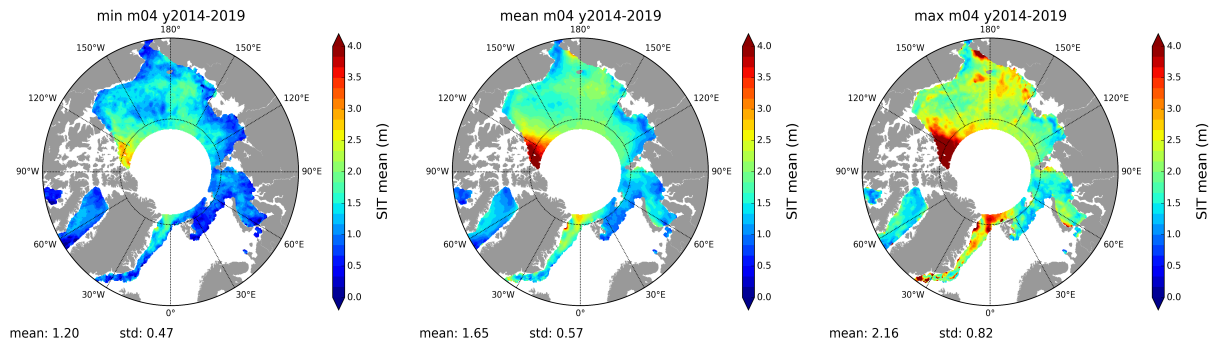

**Figure S25.** SIT climatological minimum (left), mean (center) and maximum (right) maps calculated in April considering the snow depth observation products between 2014 and 2019 (case « obs snow products » : W99m, DuST, AMSR2B, and ASD).
